# Supplementary material
Source: publisher site journal article supplement (https://www.spandidos-publications.com/7050/downloadSupplementary)
Supplement: Supplementary file 1 [file downloadSupplementary]

## Sheet: KEGG in Fig. 4E
Table SII. Kyoto Encyclopedia of Genes and Genomes pathways enriched in PAX-interacting protein 1-associated genes in the hepatocellular carcinoma cohort.
Gene Set	Description	Size	Leading Edge Number	ES	NES	P Value	FDR
hsa05016	Huntington disease	174	68	-0.65518	-2.2432	<2.2x10-16	<2.2x10-16
hsa04723	Retrograde endocannabinoid signaling	140	34	-0.63772	-2.249	<2.2x10-16	<2.2x10-16
hsa04260	Cardiac muscle contraction	74	19	-0.75833	-2.301	<2.2x10-16	<2.2x10-16
hsa04714	Thermogenesis	189	65	-0.63737	-2.3507	<2.2x10-16	<2.2x10-16
hsa04932	Non-alcoholic fatty liver disease (NAFLD)	143	55	-0.7215	-2.388	<2.2x10-16	<2.2x10-16
hsa05010	Alzheimer disease	152	61	-0.70014	-2.4334	<2.2x10-16	<2.2x10-16
hsa03050	Proteasome	44	28	-0.88348	-2.4774	<2.2x10-16	<2.2x10-16
hsa05012	Parkinson disease	115	58	-0.8296	-2.8065	<2.2x10-16	<2.2x10-16
hsa03010	Ribosome	131	103	-0.84542	-2.9289	<2.2x10-16	<2.2x10-16
hsa00190	Oxidative phosphorylation	104	63	-0.89076	-3.0029	<2.2x10-16	<2.2x10-16
hsa04110	Cell cycle	118	48	0.634	1.5711	<2.2x10-16	0.05115
hsa05206	MicroRNAs in cancer	149	57	0.65017	1.6241	<2.2x10-16	0.05369
hsa04550	Signaling pathways regulating pluripotency of stem cells	136	49	0.62244	1.5537	<2.2x10-16	0.060075
hsa03460	Fanconi anemia pathway	44	21	0.69813	1.5928	<2.2x10-16	0.061671
hsa04919	Thyroid hormone signaling pathway	116	40	0.63648	1.5759	<2.2x10-16	0.061913
hsa04070	Phosphatidylinositol signaling system	97	29	0.63254	1.5371	<2.2x10-16	0.07207
hsa00562	Inositol phosphate metabolism	74	27	0.63689	1.5191	0.0043573	0.091211
hsa03440	Homologous recombination	34	17	0.68202	1.5014	0.022005	0.10992
hsa03015	mRNA surveillance pathway	87	23	0.60998	1.4895	0.0021786	0.11159
hsa04392	Hippo signaling pathway	25	9	0.70193	1.4633	0.020408	0.11164
ES, enrichment score; FDR, false discovery rate; NES, normalized enrichment score.
